# Supplementary material for: Development of alternative splicing signature in lung squamous cell carcinoma
Source: Research Square preprint supplement (doi:10.21203/rs.3.rs-221344/v1), 2021-02-23
Supplement: Supplementary file 1 [file 66dfb6306a8caffe3cc9a352.docx]

Table S2. The HR and *P* value of LUSC-all-multiCox

| Gene | Coefficient | HR | *P* value | Type |
| --- | --- | --- | --- | --- |
| DLX4 | -4.2089 | 0.0148 | 0.0017 | AT |
| DSP | 5.3175 | 23.8897 | 0.0002 | AD |
| FANCA | -15.0310 | 6.95e-66 | 0.0074 | ES |
| MINPP1 | -23.4904 | 6.28e-11 | 0.0002 | ES |
| WDR33 | -2.2665 | 0.1036 | 0.0003 | RI |
| ZMYND8 | 2.1700 | 8.7587 | 0.0391 | AP |
| NADSYN1 | 1.3435 | 3.8327 | 0.0132 | ES |
| ATXN2L | 2.1721 | 8.7773 | 0.0094 | ES |
| DEPDC5 | -16.5220 | 2.32e-64 | 0.0084 | ES |
| PARP9 | -7.5158 | 0.0005 | 0.0019 | ES |
| FGD2 | -6.8597 | 0.0010 | 0.0003 | ES |
| PLEKHG5 | 3.9325 | 51.0676 | 0.0079 | AP |
| SNCAIP | -3.0582 | 0.0469 | 0.0031 | AT |
| EMC4 | -10.6564 | 2.35e-05 | 0.0066 | ES |

HR, hazard ratio.
